# Supplementary material for: Colorimetric and fluorometric dual-mode detection of aniline pollutants based on spiropyran derivatives
Source: Royal Society of Chemistry journal article supplement (doi:10.1039/c6ra17862f), 2016-01-01
Supplement: c6ra17862f1.pdf [file c6ra17862f1.pdf]

## Supporting Information

### Colorimetric and Fluorometric Dual-mode Detection of Aniline

#### Pollutant Based on Spiropyran Derivatives

Weiguo Tian<sup>†a, b, c</sup>, Yanan Xue<sup>†a</sup>, Jintao Tian<sup>\*a</sup>, Peizhen Gong<sup>a</sup>, Jinhui Dai<sup>a</sup>, Xin Wang<sup>a</sup>,

Zhibin Zhu<sup>a</sup>

<sup>a</sup> Institute of Materials Science and Engineering, Ocean University of China, Songling Road 238,  
Qingdao, 266100, China.

<sup>b</sup> Beijing National Laboratory for Molecular Sciences, CAS Key Laboratory of Engineering  
Plastics, Institute of Chemistry, Chinese Academy of Sciences (CAS), Beijing, 100190, China

<sup>c</sup> University of Chinese Academy of Sciences, Beijing, 100039, China

#### Content

**Table S1** True and predicted aniline concentration determined by naked eye from color standard

**Table S2** True and predicted aniline concentration determined by naked eye from fluorescent standard cards.

**Table S3** True and predicted aniline concentration determined by UV-Vis spectrometer.

**Table S4** True and predicted aniline concentration determined by FL spectrometer.

**Fig. S1** Synthetic routine of the SPCOOH and SP-cellulose.

**Fig. S2** Preparation procedure of the SP-cellulose paper sample.

**Fig. S3** <sup>1</sup>H NMR spectrum of the SPCOOH.

**Fig. S4** FTIR spectrum of the SPCOOH.

---

<sup>†</sup> These authors contributed equally to this work.

\* Corresponding author. Tel: +86-532-66781690; Fax: +86-532-66781320; E-mail: jttian@ouc.edu.cn

**Table S1** True and predicted aniline concentration determined by naked eye from color standard cards.

| <b>Group 1</b> |           |          | <b>Group 2</b> |           |          |
|----------------|-----------|----------|----------------|-----------|----------|
| True           | Predicted |          | True           | Predicted |          |
| 1.00E+00       | 1         | 6.00E-01 | 5.00E-01       | 1         | 6.00E-01 |
|                | 2         | 1.00E+00 |                | 2         | 5.00E-01 |
|                | 3         | 6.00E-01 |                | 3         | 6.00E-01 |
|                | 4         | 1.00E+00 |                | 4         | 1.00E-01 |
|                | 5         | 8.00E-01 |                | 5         | 6.00E-01 |
|                | Av.       | 8.00E-01 |                | Av.       | 4.80E-01 |
|                | $\sigma$  | 2.00E-01 |                | $\sigma$  | 2.17E-01 |
| <b>Group 3</b> |           |          | <b>Group 4</b> |           |          |
| True           | Predicted |          | True           | Predicted |          |
| 1.00E-01       | 1         | 1.00E-01 | 1.00E-02       | 1         | 5.00E-03 |
|                | 2         | 5.00E-02 |                | 2         | 1.00E-02 |
|                | 3         | 5.00E-02 |                | 3         | 5.00E-03 |
|                | 4         | 1.00E-01 |                | 4         | 5.00E-03 |
|                | 5         | 5.00E-02 |                | 5         | 1.00E-03 |
|                | Av.       | 7.00E-02 |                | Av.       | 5.20E-03 |
|                | $\sigma$  | 2.74E-02 |                | $\sigma$  | 3.19E-03 |
| <b>Group 5</b> |           |          | <b>Group 6</b> |           |          |
| True           | Predicted |          | True           | Predicted |          |
| 1.00E-04       | 1         | 1.00E-04 | 1.00E-06       | 1         | 1.00E-07 |
|                | 2         | 1.00E-05 |                | 2         | 1.00E-06 |
|                | 3         | 1.00E-04 |                | 3         | 1.00E-07 |
|                | 4         | 1.00E-05 |                | 4         | 1.00E-06 |
|                | 5         | 5.00E-05 |                | 5         | 5.00E-07 |
|                | Av.       | 5.40E-05 |                | Av.       | 5.40E-07 |
|                | $\sigma$  | 4.51E-05 |                | $\sigma$  | 4.51E-07 |

Note: unit mol/L; Av. = Average;  $\sigma$  = Standard deviation

**Table S2** True and predicted aniline concentration determined by naked eye from fluorescent standard cards.

| <b>Group 1</b> |           |          | <b>Group 2</b> |           |          |
|----------------|-----------|----------|----------------|-----------|----------|
| True           | Predicted |          | True           | Predicted |          |
| 1.00E+00       | 1         | 8.00E-01 | 5.00E-01       | 1         | 4.00E-01 |
|                | 2         | 1.00E+00 |                | 2         | 5.00E-01 |
|                | 3         | 8.00E-01 |                | 3         | 6.00E-01 |
|                | 4         | 5.00E-01 |                | 4         | 8.00E-01 |
|                | 5         | 1.00E+00 |                | 5         | 5.00E-01 |
|                | Av.       | 8.20E-01 |                | Av.       | 5.60E-01 |
|                | $\sigma$  | 2.05E-01 |                | $\sigma$  | 1.52E-01 |
| <b>Group 3</b> |           |          | <b>Group 4</b> |           |          |
| True           | Predicted |          | True           | Predicted |          |
| 1.00E-01       | 1         | 5.00E-02 | 1.00E-02       | 1         | 1.00E-02 |
|                | 2         | 5.00E-02 |                | 2         | 1.00E-02 |
|                | 3         | 1.00E-01 |                | 3         | 5.00E-03 |
|                | 4         | 1.00E-01 |                | 4         | 1.00E-03 |
|                | 5         | 1.00E-01 |                | 5         | 5.00E-03 |
|                | Av.       | 8.00E-02 |                | Av.       | 6.20E-03 |
|                | $\sigma$  | 2.74E-02 |                | $\sigma$  | 3.83E-03 |
| <b>Group 5</b> |           |          | <b>Group 6</b> |           |          |
| True           | Predicted |          | True           | Predicted |          |
| 1.00E-04       | 1         | 1.00E-04 | 1.00E-06       | 1         | 1.00E-07 |
|                | 2         | 5.00E-05 |                | 2         | 1.00E-06 |
|                | 3         | 8.00E-05 |                | 3         | 5.00E-07 |
|                | 4         | 5.00E-05 |                | 4         | 1.00E-07 |
|                | 5         | 2.50E-04 |                | 5         | 5.00E-07 |
|                | Av.       | 1.06E-04 |                | Av.       | 4.40E-07 |
|                | $\sigma$  | 8.32E-05 |                | $\sigma$  | 3.71E-07 |

Note: unit mol/L; Av. = Average;  $\sigma$  = Standard deviation

**Table S3** True and predicted aniline concentration determined by UV-Vis spectrometer.

| <b>Group 1</b> |           | <b>Group 2</b> |            |            |            |
|----------------|-----------|----------------|------------|------------|------------|
| True           | Predicted | True           | Predicted  |            |            |
| 5.0000E-02     | 1         | 4.8142E-02     | 1          | 5.0250E-03 |            |
|                | 2         | 4.8553E-02     | 2          | 4.9228E-03 |            |
|                | 3         | 5.1576E-02     | 3          | 4.9346E-03 |            |
|                | 4         | 5.0240E-02     | 5.00E-03   | 4          | 4.8008E-03 |
|                | 5         | 5.1725E-02     | 5          | 5.2034E-03 |            |
|                | Av.       | 5.0047E-02     | Av.        | 4.9773E-03 |            |
|                | $\sigma$  | 1.6620E-03     | $\sigma$   | 1.4946E-04 |            |
| <b>Group 3</b> |           | <b>Group 4</b> |            |            |            |
| True           | Predicted | True           | Predicted  |            |            |
| 5.0000E-04     | 1         | 4.8848E-04     | 1          | 4.9583E-05 |            |
|                | 2         | 5.1119E-04     | 2          | 5.0115E-05 |            |
|                | 3         | 4.9069E-04     | 3          | 5.0560E-05 |            |
|                | 4         | 5.0242E-04     | 5.0000E-05 | 4          | 5.0989E-05 |
|                | 5         | 5.0898E-04     | 5          | 4.9909E-05 |            |
|                | Av.       | 5.0035E-04     | Av.        | 5.0231E-05 |            |
|                | $\sigma$  | 1.0370E-05     | $\sigma$   | 5.5238E-07 |            |
| <b>Group 5</b> |           | <b>Group 6</b> |            |            |            |
| True           | Predicted | True           | Predicted  |            |            |
| 5.0000E-06     | 1         | 5.0046E-06     | 1          | 5.1220E-07 |            |
|                | 2         | 4.9439E-06     | 2          | 4.9063E-07 |            |
|                | 3         | 5.0256E-06     | 3          | 4.9422E-07 |            |
|                | 4         | 4.9683E-06     | 5.0000E-07 | 4          | 4.9333E-07 |
|                | 5         | 5.0465E-06     | 5          | 5.1007E-07 |            |
|                | Av.       | 4.9978E-06     | Av.        | 5.0009E-07 |            |
|                | $\sigma$  | 4.1726E-08     | $\sigma$   | 1.0199E-08 |            |
| <b>Group 7</b> |           |                |            |            |            |
| True           | Predicted |                |            |            |            |
| 5.0000E-08     | 1         | 5.1583E-08     |            |            |            |
|                | 2         | 4.9828E-08     |            |            |            |
|                | 3         | 4.8772E-08     |            |            |            |
|                | 4         | 4.9255E-08     |            |            |            |
|                | 5         | 5.1617E-08     |            |            |            |
|                | Av.       | 5.0211E-08     |            |            |            |
|                | $\sigma$  | 1.3221E-09     |            |            |            |

Note: unit mol/L; Av. = Average;  $\sigma$  = Standard deviation

**Table S4** True and predicted aniline concentration determined by FL spectrometer.

| <b>Group 1</b> |           | <b>Group 2</b> |            |            |            |
|----------------|-----------|----------------|------------|------------|------------|
| True           | Predicted | True           | Predicted  |            |            |
| 1.0000E-01     | 1         | 9.4104E-02     | 1          | 1.1010E-02 |            |
|                | 2         | 1.0929E-01     | 2          | 1.0810E-02 |            |
|                | 3         | 9.6406E-02     | 3          | 9.9700E-03 |            |
|                | 4         | 1.0041E-01     | 1.0000E-02 | 4          | 9.5740E-03 |
|                | 5         | 1.0802E-01     | 5          | 1.0210E-02 |            |
|                | Av.       | 1.0165E-01     | Av.        | 1.0315E-02 |            |
|                | $\sigma$  | 6.7987E-03     | $\sigma$   | 5.9312E-04 |            |
| <b>Group 3</b> |           | <b>Group 4</b> |            |            |            |
| True           | Predicted | True           | Predicted  |            |            |
| 1.0000E-03     | 1         | 1.0460E-03     | 1          | 1.0307E-04 |            |
|                | 2         | 1.0435E-03     | 2          | 9.9813E-05 |            |
|                | 3         | 1.0906E-03     | 3          | 1.0313E-04 |            |
|                | 4         | 1.0118E-03     | 1.0000E-04 | 4          | 9.9963E-05 |
|                | 5         | 9.9780E-04     | 5          | 1.0144E-04 |            |
|                | Av.       | 1.0379E-03     | Av.        | 1.0148E-04 |            |
|                | $\sigma$  | 3.5929E-05     | $\sigma$   | 1.6072E-06 |            |
| <b>Group 5</b> |           | <b>Group 6</b> |            |            |            |
| True           | Predicted | True           | Predicted  |            |            |
| 1.0000E-05     | 1         | 1.0259E-05     | 1          | 1.0057E-06 |            |
|                | 2         | 1.0072E-05     | 2          | 1.0923E-06 |            |
|                | 3         | 1.0330E-05     | 3          | 1.0000E-06 |            |
|                | 4         | 9.9585E-06     | 1.0000E-06 | 4          | 9.9647E-07 |
|                | 5         | 9.9260E-06     | 5          | 9.9773E-07 |            |
|                | Av.       | 1.0109E-05     | Av.        | 1.0184E-06 |            |
|                | $\sigma$  | 1.7938E-07     | $\sigma$   | 4.1443E-08 |            |
| <b>Group 7</b> |           | <b>Group 8</b> |            |            |            |
| True           | Predicted | True           | Predicted  |            |            |
| 1.0000E-07     | 1         | 9.6650E-08     | 1          | 1.8390E-08 |            |
|                | 2         | 1.1092E-07     | 2          | 2.0000E-08 |            |
|                | 3         | 1.1318E-07     | 3          | 1.6770E-08 |            |
|                | 4         | 1.1092E-07     | 1.0000E-08 | 4          | 2.1056E-08 |
|                | 5         | 1.0126E-07     | 5          | 2.3721E-08 |            |
|                | Av.       | 1.0659E-07     | Av.        | 1.9987E-08 |            |
|                | $\sigma$  | 7.2140E-09     | $\sigma$   | 2.6451E-09 |            |

Note: unit mol/L; Av. = Average;  $\sigma$  = Standard deviation

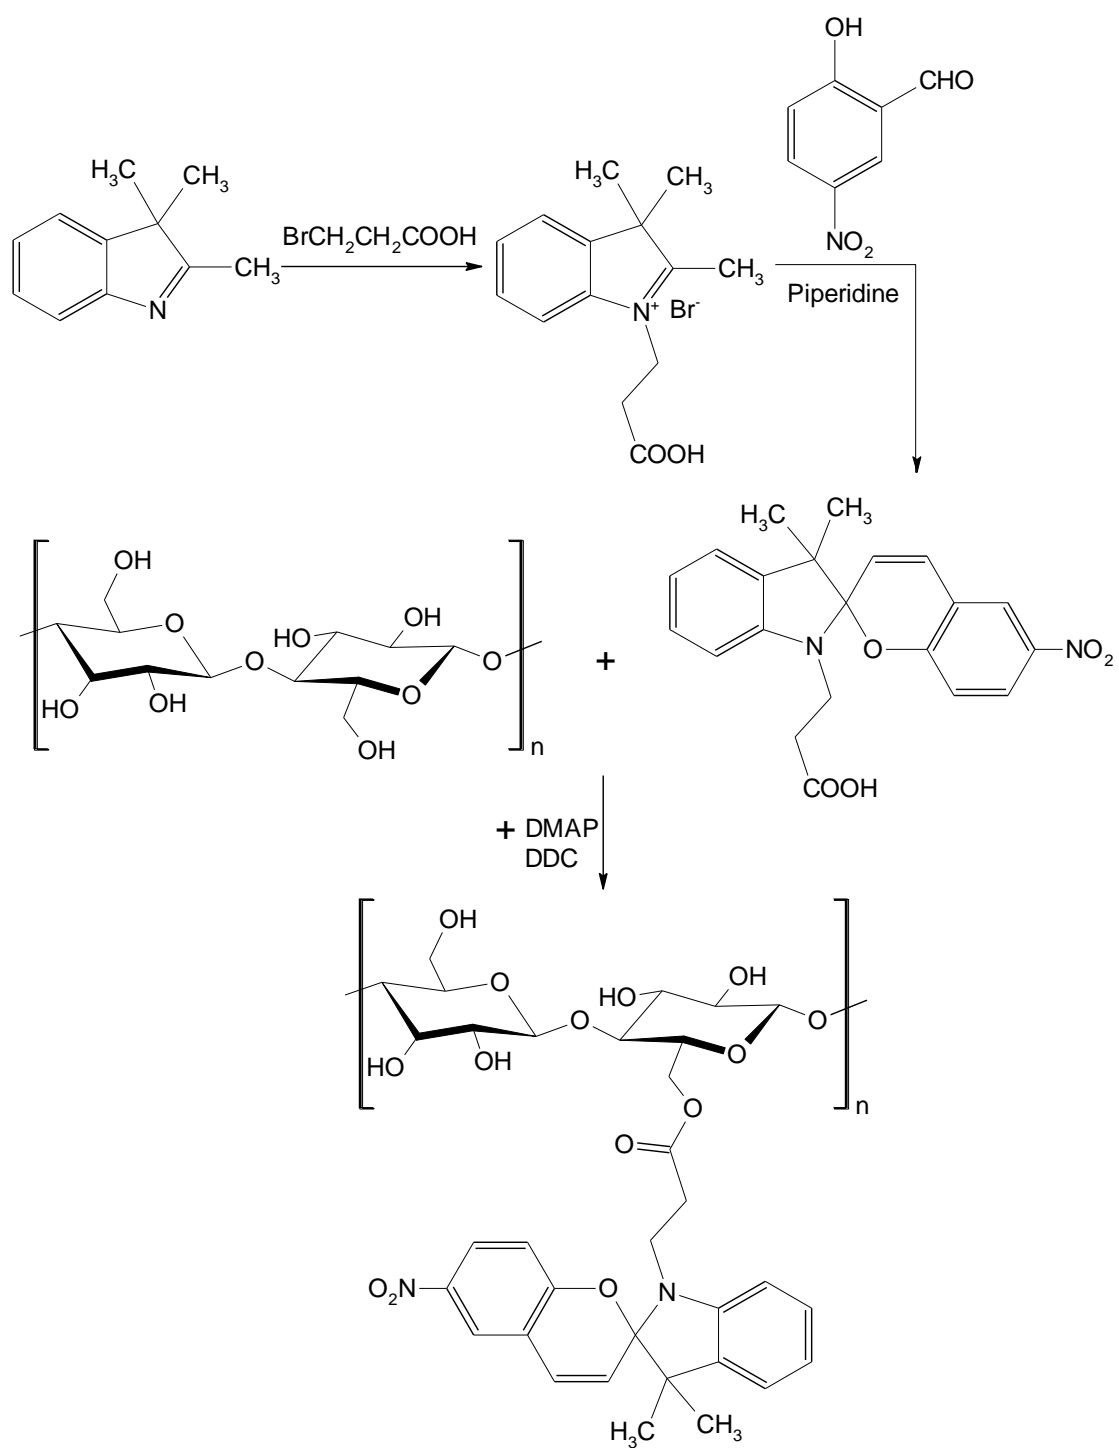

**Fig. S1** Synthetic routine of the SP-COOH and SP-cellulose.

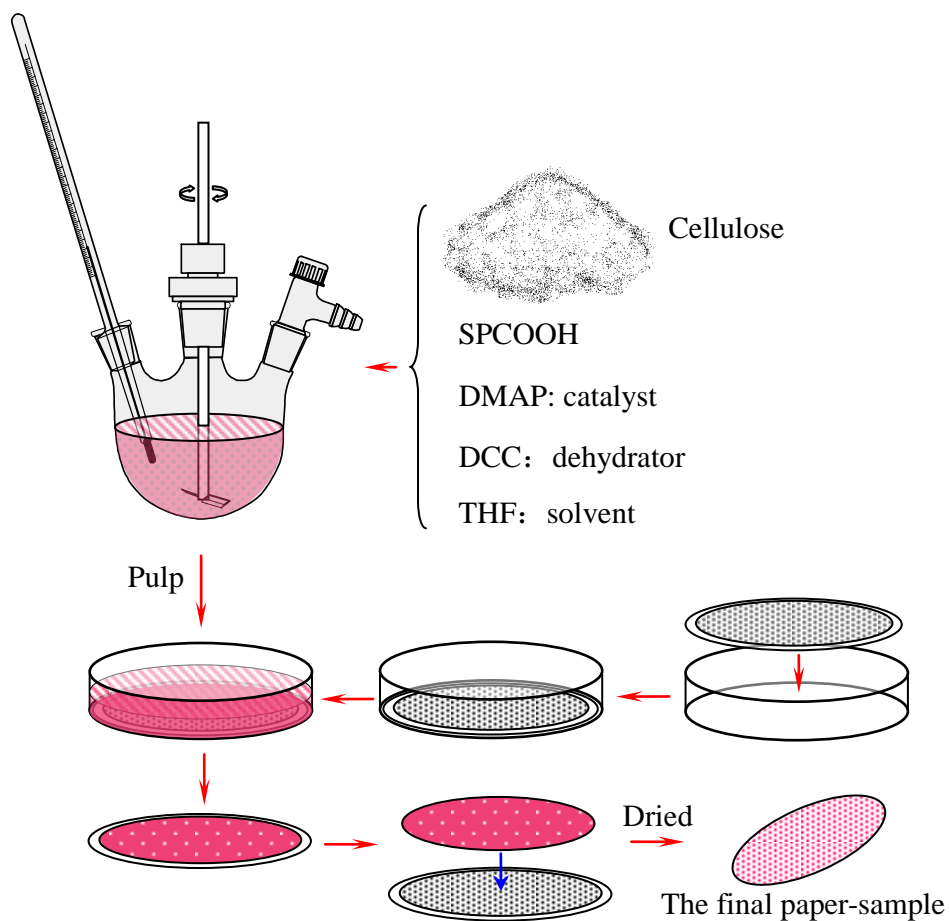

**Fig. S2** Preparation procedure of the SP-cellulose paper sample.

The content of SP in the SP-cellulose is calculated using the following method:

$$w\% = (1.90\text{g} - 0.381\text{g}) / (10\text{g} + 1.90\text{g} - 0.381\text{g}) = 13\%$$

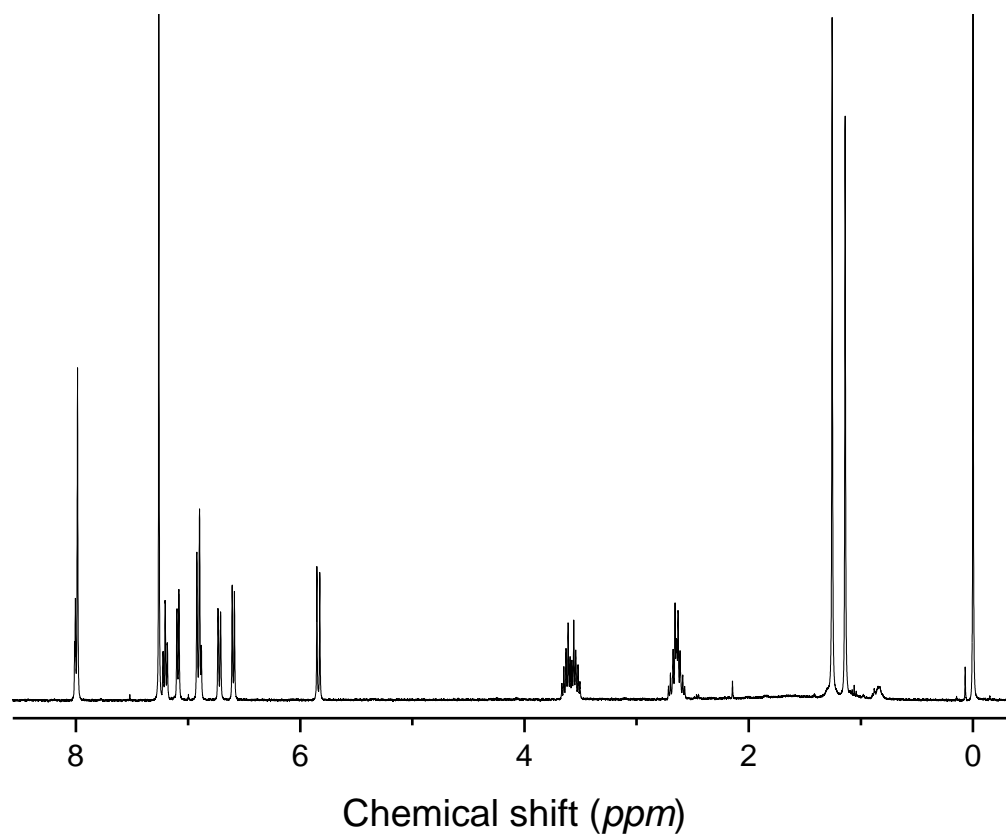

**Fig. S3**  $^1\text{H}$  NMR spectrum ( in  $\text{CDCl}_3$ ) of the SPCOOH

$^1\text{H}$  NMR (400 MHz,  $\text{CDCl}_3$ )  $\delta$ , aromatic protons, 8.06 – 7.91 (m, 2H), 7.20 (t,  $J = 7.2$  Hz, 1H), 7.09 (d,  $J = 6.7$  Hz, 1H), 6.90 (t,  $J = 7.9$  Hz, 2H), 6.72 (d,  $J = 9.3$  Hz, 1H); olefinic protons, 6.60 (d,  $J = 7.8$  Hz, 1H), 5.84 (d,  $J = 10.4$  Hz, 1H);  $\text{NCH}_2$ -, 3.59 (dtd,  $J = 22.0, 14.9, 7.1$  Hz, 2H), 2.78 – 2.49 (m, 2H);  $-\text{CH}_3(\times 2)$ , 1.26 (s, 3H), 1.14 (s, 3H).



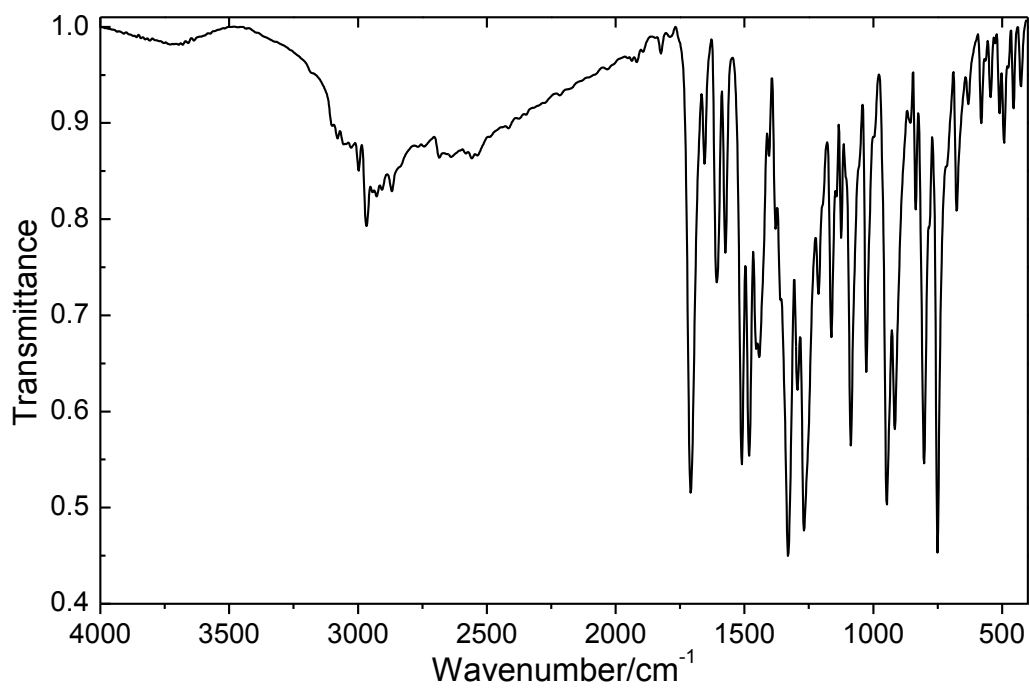

**Fig. S4** FTIR spectrum of the SPCOOH.
